# Supplementary material for: Inhibition of DNA Methylation Suppresses Intestinal Tumor Organoids by Inducing an Anti-Viral Response
Source: PubMed Central journal article supplement (PMC4855203; doi:10.1038/srep25311), 2016-05-04
Supplement: srep25311-s1.pdf [file srep25311-s1.pdf]

## **Supplementary Materials**

### **Inhibition of DNA Methylation Suppresses Intestinal Tumor Organoids by Inducing an Anti-Viral Response**

Yoshimasa Saito, Toshiaki Nakaoka, Kasumi Sakai, Toshihide Muramatsu, Kohta

Toshimitsu, Masaki Kimura, Takanori Kanai, Toshiro Sato, Hidetsugu Saito

Supplementary Table S1

Primer sequences of murine ERVs and interferon-responsive genes

| Primer                 | Sequence                       |
|------------------------|--------------------------------|
| IAP-1-forward          | 5'-GGAGAAGTCCTACCTCAGGGG-3'    |
| IAP-1-reverse          | 5'-GGAGAACAAAATGTCATCCATATA-3' |
| MLV-forward            | 5'-CCAGACTTGATCCTGCTACA-3'     |
| MLV-reverse            | 5'-CTCAGTCAGCCATCTCTGAC-3'     |
| LV30-2-forward         | 5'-CTCGCACCTTTTCGCGCTCG-3'     |
| LV30-2-reverse         | 5'-GCGAGGGGATCATCATAACA-3'     |
| MuRRS-forward          | 5'-TTAGCCTCCTTCCGAGCTGA-3'     |
| MuRRS-reverse          | 5'-GCCTCTGTCAGCCACCGTTT-3'     |
| TBP-forward            | 5'-TTCTGAGAGCTCTGGAATTGTA-3'   |
| TBP-reverse            | 5'-TGGATTGTTCTTCACTCTTGGC-3'   |
| Oas1-forward           | 5'-ATTACCTCCTTCCCGACACC-3'     |
| Oas1-reverse           | 5'-CAAACCTCCACCTCCTGATGC-3'    |
| Irf7-forward           | 5'-CTTCAGCACTTTCTTCCGAGA-3'    |
| Irf7-reverse           | 5'-TGTAGTGTGGTGACCCTTGC-3'     |
| Isg15-forward          | 5'-CCAGTCTCTGACTGTGAGAGC-3'    |
| Isg15-reverse          | 5'-GCATCACTGTGCTGCTGGGAC-3'    |
| Rig1-forward           | 5'-CCACCTACATCCTCAGCTACATGA-3' |
| Rig1-reverse           | 5'-TGGGCCCTTGTTGTTCTTCT-3'     |
| Mda5-forward           | 5'-AGATCAACACCTGTGGTAACACC-3'  |
| Mda5-reverse           | 5'-CTCTAGGGCCTCCACGAACA-3'     |
| $\beta$ -actin-forward | 5'-GAAATAGTGCGTGACATCAAAG-3'   |
| $\beta$ -actin-reverse | 5'-TGTAGTTTCATGGATGCCACAG-3'   |
